# Supplementary material for: Optimal Eye-Gaze Fixation Position for Face-Related Neural Responses
Source: PubMed Central journal article supplement (PMC3675086; doi:10.1371/journal.pone.0060128), 2013-06-06
Supplement: pone.0060128.s001.pdf [file pone.0060128.s001.pdf]

## Appendix

The MEM is a probabilistic approach based on the entropy principle aimed at inverting the following data-generative model from a distributed source model with  $N$  dipolar sources  $\mathbf{q}$ :

$$m(t) = G\mathbf{q}(t) + \eta(t) \quad (1)$$

with a solution of the form:

$$\mathbf{q} = E_p^*[\mathbf{q}] \quad (2)$$

$m(t)$  is the data at hand,  $G$  is the lead field matrix,  $\eta(t)$  is a random noise.  $E_p^*[\mathbf{q}]$  is the expectation of  $\mathbf{q}$  under its posterior probability distribution  $p^*(\mathbf{q})d(\mathbf{q})$  as obtained by the MEM. Throughout this section, the notation  $dp(\mathbf{q})$  is used as a shortcut to  $p(\mathbf{q})d\mathbf{q}$ . The general idea of the MEM is detailed in two steps: the model priors and the optimal solution.

### Priors

The first step is to define a reference distribution of source intensities  $d\mu(\mathbf{q})$  that encompasses all the prior information about our sources model. The originality of the current MEM framework is to describe the brain functional activity with  $K$  homogenous cortical parcels  $P_k$ . Each parcel gathers  $n_k$  dipoles and is characterized with a hidden state variable  $S_k$  that can be either 1 (active state) or 0 (inactive state). The probability of parcel  $k$  to be in the active state ( $p(S_k = 1)$ ) is noted  $\alpha_k$ . In practice, the reference probability distribution  $d\mu(\mathbf{q}_k)$  of the sources within parcel  $k$  is a mixture between both states :

$$d\mu_k(\mathbf{q}_k) = ((1 - \alpha_k)\delta(\mathbf{q}_k) + \alpha_k\mathcal{N}(\nu_k, \Sigma_k)(\mathbf{q}_k)) d\mathbf{q}_k \quad (3)$$

where  $\delta$  is the Dirac distribution modeling the inactive state and  $\mathcal{N}(\nu_k, \Sigma_k)$  is a  $k$ -dimension multivariate normal distribution of mean  $\nu_k$  and covariance  $\Sigma_k$  modeling the active state of parcel  $k$ . As we assume that the cortical patches are independent, the general reference model  $d\mu(\mathbf{q})$  can be written:

$$d\mu(\mathbf{q}) = \prod_{k=1}^K d\mu_k(\mathbf{q}_k) \quad (4)$$

The initial values for  $\alpha_k$  are computed using the multivariate pre-localization formalism (MSP, [1]). The MSP scores, ranging between 0 and 1, measure the ability of each source to explain the data. We thus define:

$$\alpha_k = \text{median}(r_k) \quad (5)$$

where  $r_k$  is the set of MSP scores of the  $n_k$  sources within the parcel  $k$ . The probability  $\alpha_k$  is subordinate to the definition of the parcels, which is achieved by running a region growth algorithm on the sources with highest MSP scores with a neighborhood constraint. In the present work, the size of the parcels is limited to a neighborhood order 4, thus each parcel typically gathers 50 dipoles.

### Solution

The main computational problem is the estimation of the posterior probability distribution  $dp^*(\mathbf{q})$  of source intensities. This distribution must explain the data under the constraint of maximizing the relative entropy  $S_\mu(p)$ . This entropy is a measure of the statistical distance between any probability distribution  $dp(\mathbf{q})$  and a reference probability distribution  $d\mu(\mathbf{q})$ .  $S_\mu(p)$  has a strictly negative or null value and is given by:

$$S_\mu(p) = - \int p(\mathbf{q}) \log \frac{p(\mathbf{q})}{\mu(\mathbf{q})} d\mathbf{q} \quad (6)$$

$S_\mu(p)$  can be interpreted as the effective amount of information from the data used to correct  $d\mu(\mathbf{q})$ . As  $S_\mu(p)$  is either negative or null, maximizing the entropy amounts to minimizing the statistical distance between  $dp(\mathbf{q})$  and  $d\mu(\mathbf{q})$ . The MEM principle minimizes the false assumptions about the data [2]. The numerical optimization problem for computing  $dp^*(\mathbf{q})$  is detailed by Amblard et al. [3].

## References

1. Mattout J, Plgrini-Issac M, Garnero L, Benali H (2005) Multivariate source prelocalization (msp): use of functionally informed basis functions for better conditioning the meg inverse problem. *Neuroimage* 26: 356-373.
2. Jaynes ET (1957) Information theory and statistical mechanics. *Phys Rev* 106.
3. Amblard C, Lapalme E, Lina J (2004) Biomagnetic source detection by maximum entropy and graphical models. *IEEE Trans Biomed Eng* 51.
